# Supplementary material
Source: publisher site journal article supplement (https://www.spandidos-publications.com/2871/downloadSupplementary)
Supplement: Supplementary file 1 [file downloadSupplementary]

## Sheet: Sheet1
Table SIV. KEGG pathway analysis of 386 trans-targets.
Pathway	Description	Count	Genes
hsa00512	Mucin type O-glycan biosynthesis	3	GALNT4 GALNT15 POC1B-GALNT4
hsa00120	Primary bile acid biosynthesis	2	CYP8B1 AKR1D1
hsa00750	Vitamin B6 metabolism	1	PNPO
hsa00380	Tryptophan metabolism	3	INMT IDO1 ALDH1B1
hsa00071	Fatty acid degradation	3	CPT1A ALDH1B1 ACSL6
hsa04142	Lysosome	6	IDS ATP6V0A2 ENTPD4 AP3S2 AP4S1 AP1S3
hsa00563	Glycosylphosphatidylinositol (GPI)-anchor biosynthesis	2	PIGX PIGC
hsa00601	Glycosphingolipid biosynthesis - lacto and neolacto series	2	FUT2 FUT3
hsa00600	Sphingolipid metabolism	3	SGPP2 SPTLC2 ACER3
hsa00760	Nicotinate and nicotinamide metabolism	2	QPRT NMNAT1
hsa00533	Glycosaminoglycan biosynthesis - keratan sulfate	1	CHST6
hsa00061	Fatty acid biosynthesis	1	ACSL6
hsa05032	Morphine addiction	4	GRK3 KCNJ5 OPRM1 PDE4C
hsa00603	Glycosphingolipid biosynthesis - globo and isoglobo series	1	FUT2
hsa00230	Purine metabolism	5	AK3 AK1 ENTPD4 PDE4C PDE6A
hsa04217	Necroptosis	6	JAK3 PGAM5 ZBP1 CAMK2G HMGB1 XIAP
hsa00260	Glycine, serine and threonine metabolism	2	GAMT PIPOX
hsa00500	Starch and sucrose metabolism	2	PGM2L1 GPI
hsa04216	Ferroptosis	2	ACSL6 GCLM
hsa00561	Glycerolipid metabolism	3	ALDH1B1 DGKH MBOAT1
hsa00620	Pyruvate metabolism	2	ME2 ALDH1B1
hsa00730	Thiamine metabolism	1	AK1
hsa00450	Selenocompound metabolism	1	INMT
hsa04115	p53 signaling pathway	3	ZMAT3 MDM4 CD82
hsa04925	Aldosterone synthesis and secretion	4	LDLR KCNJ5 CAMK2G CAMK1D
hsa05216	Thyroid cancer	2	TCF7 TPM3
hsa05143	African trypanosomiasis	2	IDO1 APOL1
hsa01524	Platinum drug resistance	3	SLC31A1 XIAP POLH
hsa00531	Glycosaminoglycan degradation	1	IDS
hsa03320	PPAR signaling pathway	3	CPT1A CYP8B1 ACSL6
hsa04340	Hedgehog signaling pathway	2	GRK3 KIF3A
hsa00270	Cysteine and methionine metabolism	2	MRI1 GCLM
hsa04921	Oxytocin signaling pathway	5	KCNJ5 CAMK2G CAMK1D PPP1R12B EEF2K
hsa00100	Steroid biosynthesis	1	CYP51A1
hsa01100	Metabolic pathways	30	MRI1 GALNT4 IDS GALNT15 CYP8B1 AKR1D1 IDO1 FUT2 PIGX ATP6V0A2 FUT3 CYP51A1 GAMT GPI ALDH1B1 PIPOX AK1 PNPO POC1B-GALNT4 DBT MGAT4A SPTLC2 DGKH ISPD ACSL6 MBOAT1 PIGC QPRT NMNAT1 GCLM
hsa00520	Amino sugar and nucleotide sugar metabolism	2	GPI CYB5R3
hsa00280	Valine, leucine and isoleucine degradation	2	ALDH1B1 DBT
hsa00670	One carbon pool by folate	1	MTFMT
hsa00514	Other types of O-glycan biosynthesis	1	POFUT1
hsa00330	Arginine and proline metabolism	2	GAMT ALDH1B1
hsa00515	Mannose type O-glycan biosynthesis	1	ISPD
hsa00340	Histidine metabolism	1	ALDH1B1
hsa04977	Vitamin digestion and absorption	1	LRAT
hsa03460	Fanconi anemia pathway	2	POLH BRIP1
hsa04140	Autophagy - animal	4	ATG14 HMGB1 RUBCN SNAP29
hsa04146	Peroxisome	3	PEX13 PIPOX ACSL6
hsa04934	Cushing syndrome	5	TCF7 LDLR CAMK2G FZD3 RBBP5
hsa03022	Basal transcription factors	2	GTF2H5 TAF8
hsa01212	Fatty acid metabolism	2	CPT1A ACSL6
hsa04360	Axon guidance	5	SEMA3E CAMK2G DPYSL5 FZD3 SEMA4F
hsa03018	RNA degradation	3	PNPT1 DCP1A DIS3L
hsa04744	Phototransduction	1	PDE6A
hsa00053	Ascorbate and aldarate metabolism	1	ALDH1B1
hsa04392	Hippo signaling pathway - multiple species	1	MOB1A
hsa00310	Lysine degradation	2	ALDH1B1 PIPOX
hsa00410	beta-Alanine metabolism	1	ALDH1B1
hsa00030	Pentose phosphate pathway	1	GPI
hsa05217	Basal cell carcinoma	2	TCF7 FZD3
hsa04916	Melanogenesis	3	TCF7 CAMK2G FZD3
hsa00640	Propanoate metabolism	1	DBT
hsa03410	Base excision repair	1	HMGB1
hsa04130	SNARE interactions in vesicular transport	1	SNAP29
hsa04215	Apoptosis - multiple species	1	XIAP
hsa00051	Fructose and mannose metabolism	1	TIGAR
hsa04966	Collecting duct acid secretion	1	ATP6V0A2
hsa00010	Glycolysis / Gluconeogenesis	2	GPI ALDH1B1
hsa04137	Mitophagy - animal	2	PGAM5 TBC1D15
hsa04390	Hippo signaling pathway	4	TCF7 MOB1A NKD1 FZD3
hsa05412	Arrhythmogenic right ventricular cardiomyopathy (ARVC)	2	TCF7 DSG2
hsa04623	Cytosolic DNA-sensing pathway	2	CCL5 ZBP1
hsa00040	Pentose and glucuronate interconversions	1	ISPD
hsa03008	Ribosome biogenesis in eukaryotes	3	LSG1 RRP7A SPATA5
hsa05120	Epithelial cell signaling in Helicobacter pylori infection	2	ATP6V0A2 CCL5
hsa05214	Glioma	2	CAMK2G CAMK1D
hsa05020	Prion diseases	1	CCL5
hsa04062	Chemokine signaling pathway	5	JAK3 CCR6 GRK3 CCL5 CCL22
hsa04310	Wnt signaling pathway	4	TCF7 NKD1 CAMK2G FZD3
hsa04621	NOD-like receptor signaling pathway	5	GBP4 CCL5 MEFV XIAP NLRP12
hsa04668	TNF signaling pathway	3	PGAM5 CCL5 IRF1
hsa03440	Homologous recombination	1	BRIP1
hsa04920	Adipocytokine signaling pathway	2	CPT1A ACSL6
hsa04012	ErbB signaling pathway	2	ABL2 CAMK2G
hsa04962	Vasopressin-regulated water reabsorption	1	DCTN5
hsa04721	Synaptic vesicle cycle	2	ATP6V0A2 SLC6A4
hsa00565	Ether lipid metabolism	1	GDPD1
hsa04120	Ubiquitin mediated proteolysis	3	UBOX5 XIAP UBE2G2
hsa04141	Protein processing in endoplasmic reticulum	4	ATF6 UGGT1 FBXO6 UBE2G2
hsa04913	Ovarian steroidogenesis	1	LDLR
hsa04979	Cholesterol metabolism	1	LDLR
hsa04020	Calcium signaling pathway	4	F2R CAMK2G CAMK1D ORAI2
hsa00510	N-Glycan biosynthesis	1	MGAT4A
hsa05340	Primary immunodeficiency	1	JAK3
hsa04713	Circadian entrainment	2	KCNJ5 CAMK2G
hsa04610	Complement and coagulation cascades	2	F2R ITGAX
hsa04978	Mineral absorption	1	SLC31A1
hsa04550	Signaling pathways regulating pluripotency of stem cells	3	JAK3 SMAD9 FZD3
hsa00240	Pyrimidine metabolism	1	ENTPD4
hsa03420	Nucleotide excision repair	1	GTF2H5
hsa04330	Notch signaling pathway	1	DTX3L
hsa05110	Vibrio cholerae infection	1	ATP6V0A2
hsa04922	Glucagon signaling pathway	2	CPT1A CAMK2G
hsa00480	Glutathione metabolism	1	GCLM
hsa04072	Phospholipase D signaling pathway	3	F2R GRM6 DGKH
hsa05213	Endometrial cancer	1	TCF7
hsa00970	Aminoacyl-tRNA biosynthesis	1	MTFMT
hsa04024	cAMP signaling pathway	4	F2R CAMK2G PDE4C GIPR
hsa04625	C-type lectin receptor signaling pathway	2	IRF1 CCL22
hsa00564	Glycerophospholipid metabolism	2	DGKH MBOAT1
hsa01200	Carbon metabolism	2	ME2 GPI
hsa04724	Glutamatergic synapse	2	GRK3 GRM6
hsa04931	Insulin resistance	2	CPT1A PPP1R3B
hsa05200	Pathways in cancer	9	JAK3 TCF7 F2R RASGRP4 CAMK2G FZD3 XIAP TPM3 PLEKHG5
hsa04152	AMPK signaling pathway	2	CPT1A EEF2K
hsa04071	Sphingolipid signaling pathway	2	SGPP2 SPTLC2
hsa05221	Acute myeloid leukemia	1	TCF7
hsa04726	Serotonergic synapse	2	KCNJ5 SLC6A4
hsa05230	Central carbon metabolism in cancer	1	TIGAR
hsa04720	Long-term potentiation	1	CAMK2G
hsa05205	Proteoglycans in cancer	3	CAMK2G PPP1R12B FZD3
hsa04728	Dopaminergic synapse	2	KCNJ5 CAMK2G
hsa05031	Amphetamine addiction	1	CAMK2G
hsa04810	Regulation of actin cytoskeleton	3	F2R PPP1R12B ITGAX
hsa05223	Non-small cell lung cancer	1	JAK3
hsa04917	Prolactin signaling pathway	1	IRF1
hsa00140	Steroid hormone biosynthesis	1	AKR1D1
hsa00830	Retinol metabolism	1	LRAT
hsa04976	Bile secretion	1	LDLR
hsa04927	Cortisol synthesis and secretion	1	LDLR
hsa04971	Gastric acid secretion	1	CAMK2G
hsa04210	Apoptosis	2	DFFA XIAP
hsa04662	B cell receptor signaling pathway	1	LILRB3
hsa04261	Adrenergic signaling in cardiomyocytes	2	CAMK2G TPM3
hsa04520	Adherens junction	1	TCF7
hsa04014	Ras signaling pathway	3	RASGRP4 ABL2 REL
hsa05226	Gastric cancer	2	TCF7 FZD3
hsa01521	EGFR tyrosine kinase inhibitor resistance	1	AXL
hsa05224	Breast cancer	2	TCF7 FZD3
hsa05165	Human papillomavirus infection	5	TCF7 ATP6V0A2 IRF1 FZD3 TADA3
hsa04918	Thyroid hormone synthesis	1	SLC26A4
hsa04260	Cardiac muscle contraction	1	TPM3
hsa04714	Thermogenesis	3	CPT1A ACSL6 COA7
hsa04915	Estrogen signaling pathway	2	KCNJ5 OPRM1
hsa05210	Colorectal cancer	1	TCF7
hsa03010	Ribosome	2	RPL36A MRPL30
hsa05225	Hepatocellular carcinoma	2	TCF7 FZD3
hsa04080	Neuroactive ligand-receptor interaction	4	F2R OPRM1 GRM6 GIPR
hsa05152	Tuberculosis	3	ATP6V0A2 CAMK2G ITGAX
hsa04911	Insulin secretion	1	CAMK2G
hsa05410	Hypertrophic cardiomyopathy (HCM)	1	TPM3
hsa05133	Pertussis	1	IRF1
hsa04912	GnRH signaling pathway	1	CAMK2G
hsa04350	TGF-beta signaling pathway	1	SMAD9
hsa04066	HIF-1 signaling pathway	1	CAMK2G
hsa05323	Rheumatoid arthritis	2	ATP6V0A2 CCL5
hsa03015	mRNA surveillance pathway	1	SMG1
hsa05414	Dilated cardiomyopathy (DCM)	1	TPM3
hsa04144	Endocytosis	3	LDLR GRK3 RNF41
hsa05215	Prostate cancer	1	TCF7
hsa05222	Small cell lung cancer	1	XIAP
hsa04750	Inflammatory mediator regulation of TRP channels	1	CAMK2G
hsa04970	Salivary secretion	1	LYZ
hsa04070	Phosphatidylinositol signaling system	1	DGKH
hsa05146	Amoebiasis	1	SERPINB9
hsa04510	Focal adhesion	2	PPP1R12B XIAP
hsa05231	Choline metabolism in cancer	1	DGKH
hsa05145	Toxoplasmosis	2	LDLR XIAP
hsa04657	IL-17 signaling pathway	1	TRAF3IP2
hsa04060	Cytokine-cytokine receptor interaction	3	CCR6 CCL5 CCL22
hsa04670	Leukocyte transendothelial migration	1	CD99
hsa04928	Parathyroid hormone synthesis, secretion and action	1	PDE4C
hsa05167	Kaposi sarcoma-associated herpesvirus infection	2	ATG14 MICB
hsa04725	Cholinergic synapse	1	CAMK2G
hsa05142	Chagas disease (American trypanosomiasis)	1	CCL5
hsa04722	Neurotrophin signaling pathway	1	CAMK2G
hsa04064	NF-kappa B signaling pathway	1	XIAP
hsa04114	Oocyte meiosis	1	CAMK2G
hsa04620	Toll-like receptor signaling pathway	1	CCL5
hsa04672	Intestinal immune network for IgA production	1	PIGR
hsa05203	Viral carcinogenesis	2	JAK3 REL
hsa04270	Vascular smooth muscle contraction	1	PPP1R12B
hsa04611	Platelet activation	1	F2R
hsa05170	Human immunodeficiency virus 1 infection	2	APOBEC3A AP1S3
hsa04910	Insulin signaling pathway	1	PPP1R3B
hsa05162	Measles	1	JAK3
hsa05012	Parkinson disease	1	UBE2G2
hsa05206	MicroRNAs in cancer	2	FZD3 MDM4
hsa00190	Oxidative phosphorylation	1	ATP6V0A2
hsa04723	Retrograde endocannabinoid signaling	1	KCNJ5
hsa04630	JAK-STAT signaling pathway	1	JAK3
hsa05160	Hepatitis C	1	LDLR
hsa04658	Th1 and Th2 cell differentiation	1	JAK3
hsa04150	mTOR signaling pathway	1	FZD3
hsa05161	Hepatitis B	1	JAK3
hsa05416	Viral myocarditis	1	ABL2
hsa05166	Human T-cell leukemia virus 1 infection	2	JAK3 XIAP
hsa04151	PI3K-Akt signaling pathway	2	JAK3 F2R
hsa04380	Osteoclast differentiation	1	LILRB3
hsa04740	Olfactory transduction	3	OR7D2 GRK3 CAMK2G
hsa04659	Th17 cell differentiation	1	JAK3
hsa05202	Transcriptional misregulation in cancer	1	REL
hsa05010	Alzheimer disease	1	ATF6
hsa04015	Rap1 signaling pathway	1	F2R
hsa05016	Huntington disease	1	HIP1
hsa04514	Cell adhesion molecules (CAMs)	1	CD99
hsa05164	Influenza A	1	CCL5
hsa05163	Human cytomegalovirus infection	1	CCL5
hsa04145	Phagosome	1	ATP6V0A2
hsa04010	MAPK signaling pathway	1	RASGRP4
hsa04218	Cellular senescence	1	TRAF3IP2
hsa05168	Herpes simplex infection	1	CCL5
hsa05169	Epstein-Barr virus infection	1	JAK3
hsa04650	Natural killer cell mediated cytotoxicity	1	MICB
KEGG, Kyoto Encyclopedia of Genes and Genomes.
